# Supplementary material for: Control of the stepwise assembly–disassembly of DNA origami nanoclusters by pH stimuli-responsive DNA triplexes
Source: Royal Society of Chemistry journal article supplement (doi:10.1039/c9nr05047g), 2019-01-01
Supplement: c9nr05047g1.pdf [file c9nr05047g1.pdf]

## Supporting Information

### **Control of the Stepwise Assembly-Disassembly of DNA Origami**

### **Nanoclusters by pH Stimuli-Responsive DNA Triplexes**

Shuo Yang,<sup>a</sup> Wenyan Liu,<sup>a,b</sup> and Risheng Wang<sup>a,\*</sup>

<sup>a</sup>Department of Chemistry, Missouri University of Science and Technology, Rolla, MO 65409, United States

<sup>b</sup>Center for Research in Energy and Environment, Missouri University of Science and Technology, Rolla, MO 65409, United States

## **MATERIALS**

All chemicals including agarose, magnesium acetate, acetic acid, sodium hydroxyl, hydrogen chloride, were purchased from Sigma and used as received without further purification. All chemically synthesized DNA strands were purchased from Integrated DNA Technologies, Inc. ([www.Idtdna.com](http://www.Idtdna.com)). The unmodified staple DNA strands were ordered in a 96-well plate format, suspended in ultrapure water without purification. All modified strands were purified with PAGE. A circular single-stranded M13mp18 DNA genome was ordered from Bayou Biolabs. The DNA origami purification column (100kDa MWCO centrifuge filter) was purchased from Pall, Inc.

## **EXPERIMENTAL METHODS**

### **The formation of cross-shaped DNA origami unit**

The cross-shaped DNA origami was assembled by a slow cooling method. Specifically, M13mp18 viral DNA and all of the staple strands were mixed together at a ratio of 1:5, in a 1×TAE buffer solution containing 40 mM Tris-HCl, 20 mM of acetic acid, 2 mM of EDTA, and 11.5 mM of magnesium acetate. The mixture was slowly cooled from 90°C to 15°C over 12h in a thermocycler (BIO-RAD). The final concentration of M13mp18 DNA in the solution was 20 nM. The DNA origami was then purified to remove excess staple strands, using 100kDa MWCO centrifuge filters.

### **The assembly-disassembly of DNA origami dimer**

The assembly/disassembly of DNA origami dimer (A1/A2) between pH = 5.0 and pH = 7.5: the prepared DNA origami monomers were mixed at a molar ratio of 1:1 in a 1×TAE buffer solution (pH = 5.0) containing 10 mM of magnesium acetate. Then, the mixture was adjusted to pH=7.5, and annealed from 38°C to 25°C at a rate of 2.1°C/h to form the corresponding DNA origami dimers. In order to disassembly of DNA origami dimer, the pH value of the dimer solution was adjusted from 7.5 to 5 by column exchange in a 1×TAE buffer with 10 mM Mg<sup>2+</sup>, then incubated at room temperature for 6h. The assembled/disassembled DNA dimer was directly used for AFM images, and gel electrophoretic characterization without further purification. The association/dissociation of the DNA origami dimer was performed by further buffer exchange following the same incubation step as the aforementioned

procedure. The same process was followed for assembly/disassembly of the dimer (A2/A3), except the pH values changed to between pH = 7.5 and pH = 9.0.

### **The assembly-disassembly of DNA origami trimer**

#### **A. Stepwise upstream assembly process of DNA origami trimer (pH: 5.0 -7.5 – 9.0)**

1. The prepared three DNA origami monomers (A1, A2, and A3) were mixed at a molar ratio of 1:1:1 in a 1×TAE buffer solution (pH = 5.0) containing 10 mM of magnesium acetate.

2. Then the mixture was adjusted to pH=7.5, and annealed from 35°C to 25°C, at a rate of 0.8/h to form DNA origami dimers by activating the sticky end interaction in DNA triplex set T1.

3. Next, the centrifuge column was used to exchange the buffer solution to pH = 9.0. Then the mixture was re-annealed from 30°C to 25°C at a rate of 0.8°C/h to form a DNA origami trimer through activating the sticky end interaction in DNA triplex set T2 (73%TAT). The assembled DNA origami trimers were then directly imaged by AFM without further purification.

#### **B. Stepwise downstream disassembly process of DNA origami trimer (pH: 9.0 - 7.5 – 5.0)**

1. The prepared DNA origami monomers were mixed at a molar ratio of 1:1:1 in a 1×TAE buffer solution (pH = 9) containing 10 mM of magnesium acetate.

2. Then the mixture was annealed from 35°C to 25°C at a rate of 0.8°C/h to form DNA origami trimer through activating the sticky end interaction in both DNA triplexes T1 (20%TAT) and T2 (73%TAT). The dissociation of the trimers was allowed to proceed for 6 h at room temperature after changing the pH value to 7.5 through deactivating the sticky end in DNA triplex set T2 (73%TAT) only.

3. With further adjustment of the pH value to 5 with another 6h incubation at room temperature, the trimers could be totally separated into monomers with the deactivation of sticky end interaction in both DNA triplex T1 (20%TAT), and T2 (73%TAT).

### **The formation of 9-tile DNA origami**

The prepared DNA origami monomers (A4, A5, and A6) were mixed at a molar ratio of 1:4:4 in a 1×TAE buffer solution (pH = 5.0) containing 10 mM of magnesium acetate. Then the mixture was adjusted to pH=7.5, annealed from 50°C to 25°C at a rate of 2°C/h by selectively bridging titles A4 and

A5 together to form 5-tile DNA origami through DNA triplex set T1, while keeping DNA title A6 as a monomer. Next, the centrifuge column was used again to exchange the buffer solution to pH = 9.0. The mixture was reannealed from 45°C to 25°C at a rate of 3.3°C/h to form a 9-tile DNA origami by bridging title A6 to preformed 5 tile units through DNA triplex set T2.

### **The disassembly of 9-tile DNA origami**

First, the prepared DNA origami monomers were mixed at a molar ratio of 1:4:4 in a 1×TAE buffer solution (pH = 9) containing 10 mM of magnesium acetate. Then the mixture was annealed from 45°C to 25°C at a rate of 1.2°C/h to form 9-tile DNA origami. Second, adjusting the pH value to 7.5, and incubating at room temperature for 6h, 9-tile DNA origami units could be dissociated to 5-tile DNA origami units, and monomer units through deactivating the sticky end cohesion in 73%TAT triplex (T2). By further adjusting the pH value to 5.0, and incubating another 6h at room temperature, the 5-tile DNA origami disassembled to monomers through deactivating the sticky end in 20%TAT DNA triplexes (T1).

### **AFM imaging**

The AFM images of DNA origami were obtained through spotting each sample (3 µl) onto freshly cleaved muscovite mica (Ted Pella, Inc.) for 15 s. After the fixation of the targeted structure of DNA origami on mica surface, doubly distilled H<sub>2</sub>O (20-30 ul) was placed quickly on the mica to remove the buffer salts, the drop was wicked off, and the sample was dried with compressed air. Atomic force imaging was done by utilizing Nanoscope III (Digital Instruments) tapping in air; with ultra-sharp 14 series (NSC 14) tips that had been purchased from NANOANDMORE.

### **Agarose Gel Electrophoresis**

For the agarose gel under pH =5.0 and 7.5; the samples were loaded into 0.8% agarose gel with adjusted pH values that contained 5 mM Mg (CH<sub>3</sub>COO)<sub>2</sub> in a 1×TAE buffer solution under 55V at room temperature. For the agarose gel under pH =9, the concentration of Mg(CH<sub>3</sub>COO)<sub>2</sub> was changed to 2 mM. The gel was stained with ethidium bromide for visualization.

## Dynamic light scattering

The size distribution of DNA origami nanostructures was measured with a DLS analyzer (Zetasizer ZS90, Malvern, UK). The DNA origami was diluted to 10 nM by a 1× TAE buffer with 10 mM Mg<sup>2+</sup>, and injected into a 70 uL plastic cuvette to measure the size distributions. This procedure was repeated three times.

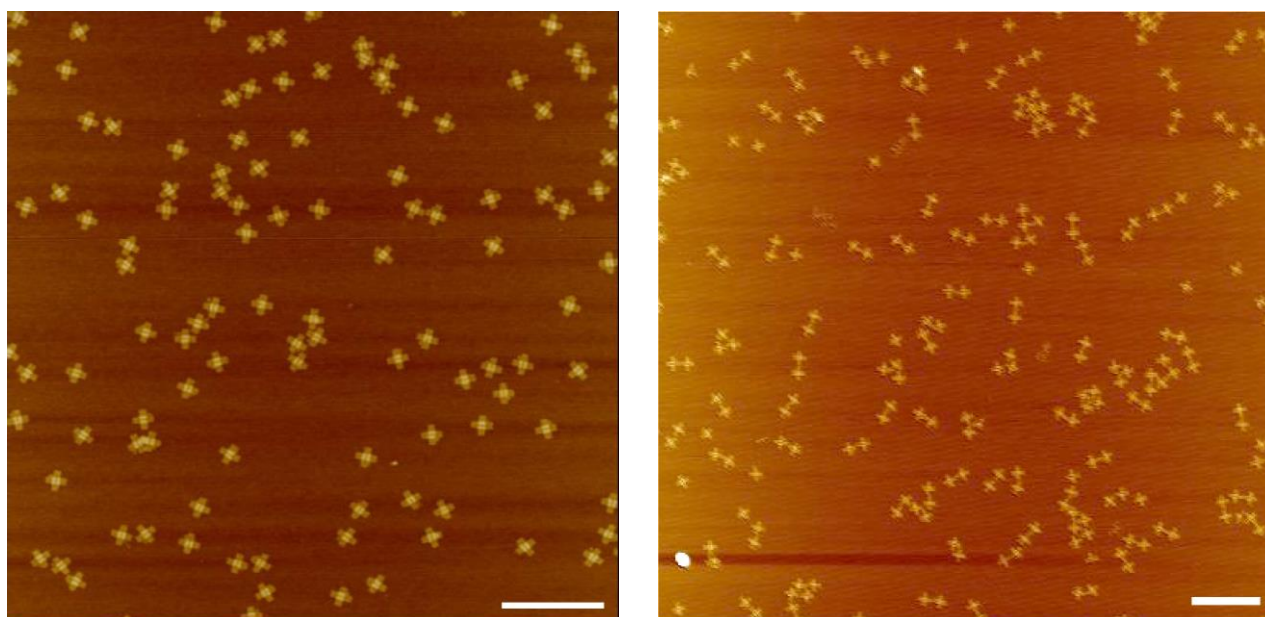

**Figure S1:** The representative AFM images of DNA origami monomer (A1) (left image) and dimer (A1/A2) (right image) without purification. The calculated yield of dimer is ~87% based on AFM results. Scale bar: 500 nm.

The equation below was used to calculate the yield of dimer.

$$\%yield = \frac{\text{Numbers of dimers} \times 2}{\text{total numbers of DNA origami}}$$

| pH values |                  | Monomer (A1, A2) | Dimer (A1/A2) | Total origamis |
|-----------|------------------|------------------|---------------|----------------|
| 5.0       | Origamis Counted | 234              | 24            | 258            |
|           | Yield (%)        | 91               | 9             |                |
| 7.5       | Origamis Counted | 44               | 286           | 330            |
|           | Yield (%)        | 13               | 87            |                |

**Table S1:** The statistical analysis of AFM images of DNA origami monomer and dimer structures generated at pH 5.0 and pH 7.5.

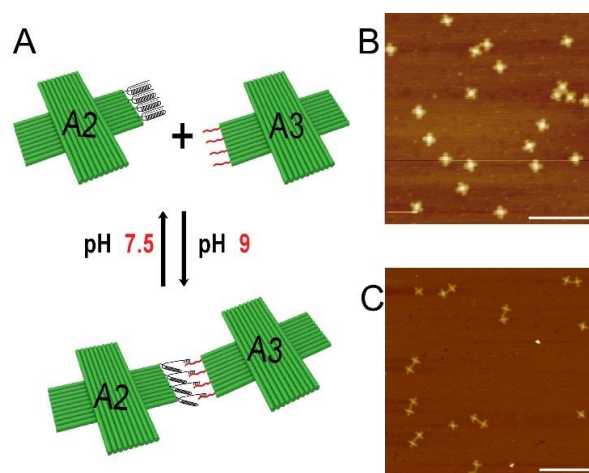

**Figure S2.** DNA triplexes (73% T-A·T)-driven assembly/disassembly of DNA origami dimer A2/A3. (A) Schematic drawing of the pH-stimulated cyclic assembly of DNA origami dimers through duplex-triplex transition of DNA triplexes between pH 7.5 and 9. (B) AFM images of DNA origami monomer at pH=7.5 and dimer at pH=9.0 (C). Scale bars: 500 nm.

| pH values |                  | Monomer (A2, A3) | Dimer (A2/A3) | Total origamis |
|-----------|------------------|------------------|---------------|----------------|
| 7.5       | Origamis Counted | 144              | 18            | 162            |
|           | Yield (%)        | 89               | 11            |                |
| 9.0       | Origamis Counted | 27               | 162           | 189            |
|           | Yield (%)        | 14               | 86            |                |

**Table S2:** The statistical analysis of AFM images of DNA origami monomer and dimer structures generated at pH 7.5 and pH 9.0.

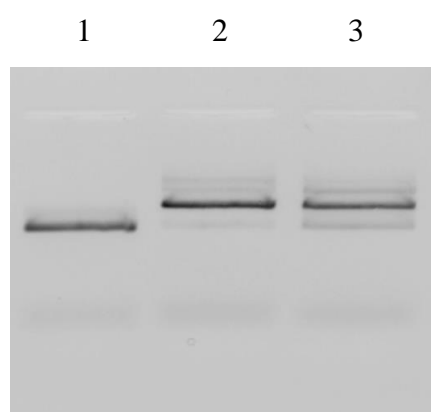

**Figure S3:** Gel electrophoresis used to compare the yield of dimer at pH 7.5 with and without thermal annealing process. Lane 1: DNA origami monomer control. Lane 2: Self-assembled dimer A1/A2 annealed from 38°C to 25°C over 6h. Lane 3: Assembled dimer A1/A2 incubated at room temperature. The dimer yield of lane 2 and lane 3 are 89%, and 75%, respectively.

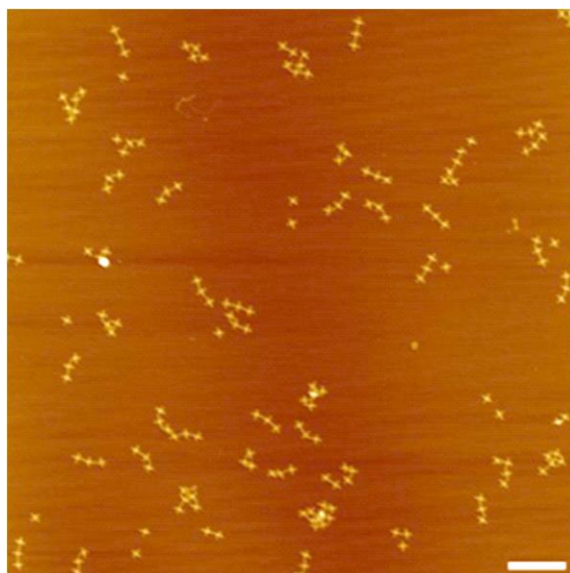

**Figure S4:** A representative AFM image of DNA origami trimer (A1/A2/A3) without purification. The calculated trimer yield was ~70% based on AFM results. Scale bar: 500nm.

| pH values |                  | Monomer<br>(A1, A2, A3) | Dimer<br>(A1/A2, A3) | Trimer<br>(A1/A2/A3) | Total origami |
|-----------|------------------|-------------------------|----------------------|----------------------|---------------|
| 5.0       | Origamis Counted | 158                     | 12                   | 0                    | 170           |
|           | Yield (%)        | 93                      | 7                    | 0                    |               |
| 7.5       | Origamis Counted | 68                      | 90                   | 15                   | 173           |
|           | Yield (%)        | 39                      | 52                   | 9                    |               |
| 9.0       | Origamis Counted | 33                      | 22                   | 126                  | 181           |
|           | Yield (%)        | 18                      | 12                   | 70                   |               |

**Table S3:** The statistical analysis of AFM images of origami monomer, dimer and trimer structures generated at pH 5.0, pH 7.5 and pH 9.0.

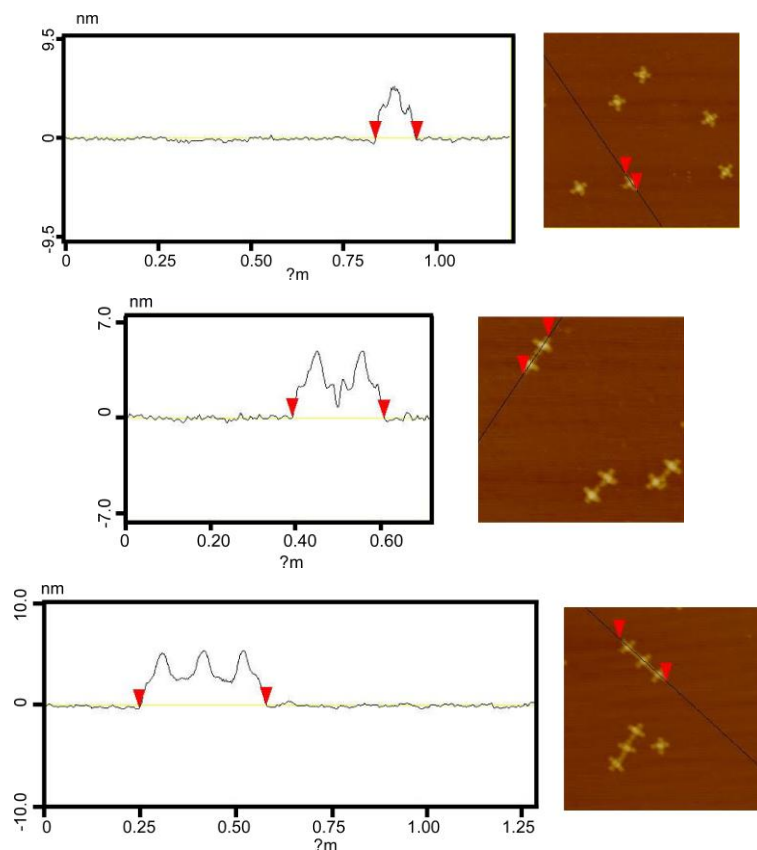

**Figure S5:** Cross-section analysis of self-assembled DNA origami monomer, dimer, and trimer. The size of monomer is  $\sim 100$  nm, dimer is  $\sim 200$  nm, and trimer is  $\sim 300$  nm, which is consistent with design.

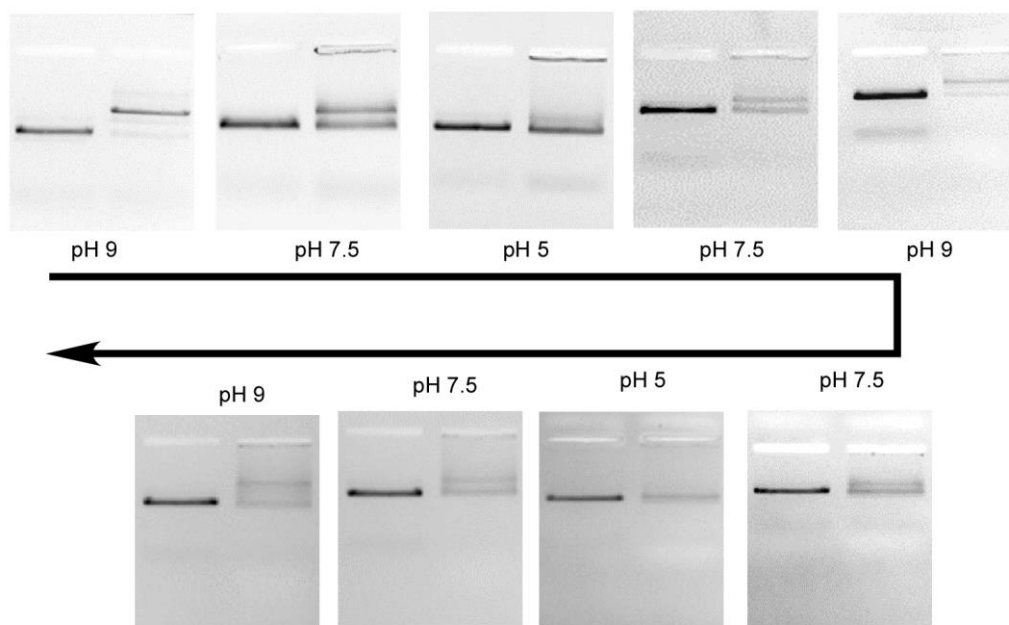

**Figure S6:** Gel electrophoresis to show the reversible, multistep assembly of DNA origami nanostructures driven by DNA triplexes in response to pH. For each image, the left lane and right lane represent DNA origami monomer control and sample, respectively. For each of the two working cycles, the DNA trimer (pH=9) dissociates to dimer (pH=7.5) and further to monomer (pH=5), and the process reverses when the pH increases.



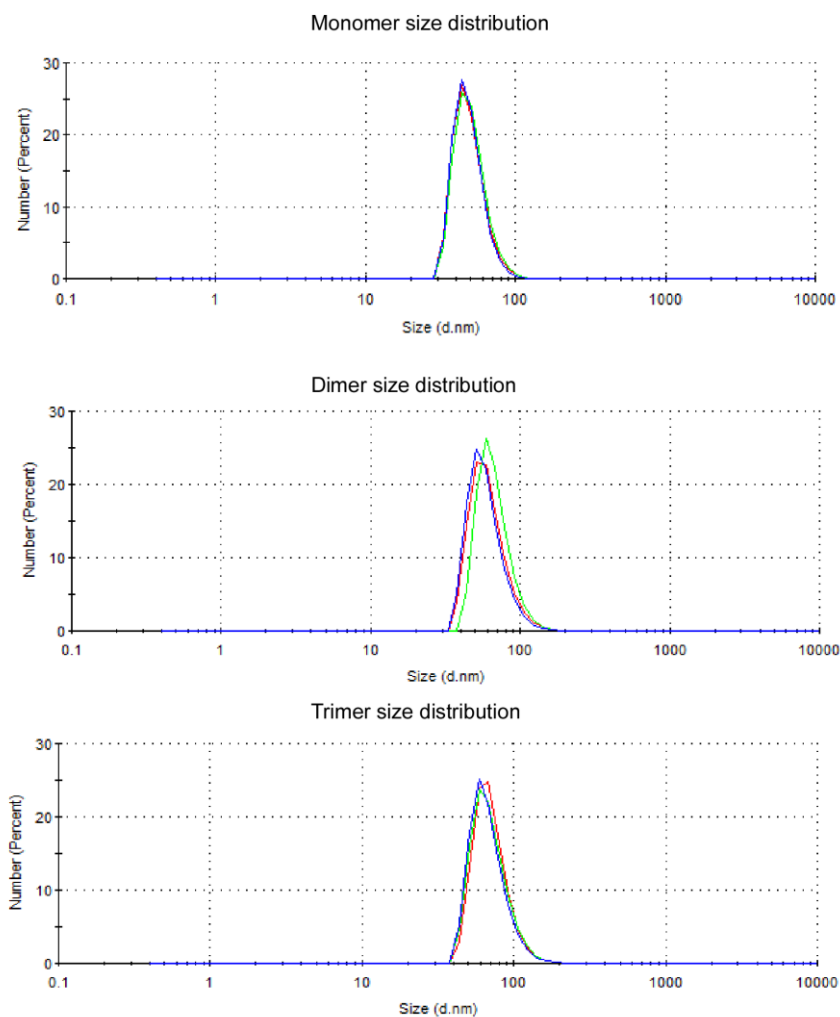

**Figure S7:** Hydrodynamic size distribution of the DNA origami nanostructures from DLS measurements. The three different colored (red, green, and blue) lines represent the three runs. The average size of monomer, dimer, and trimer is  $49.43 \pm 0.90$  nm,  $62.73 \pm 3.81$  nm, and  $70.03 \pm 1.39$  nm, respectively.

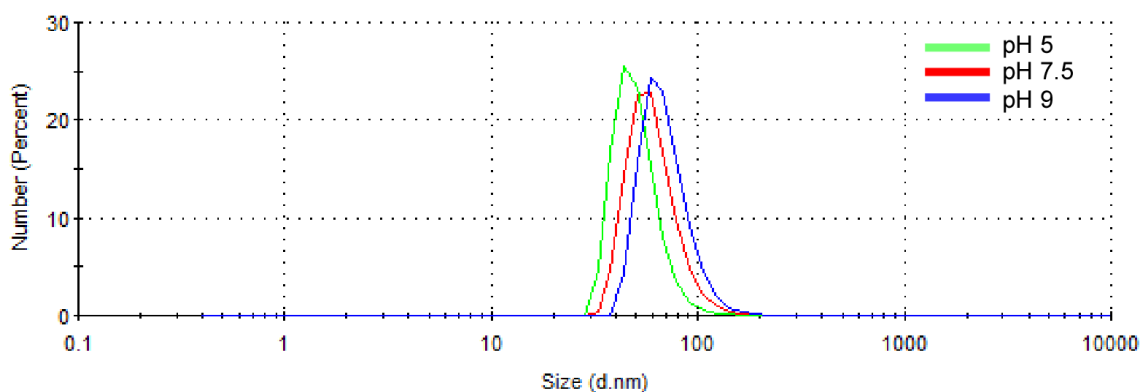

**Figure S8:** DLS measurements to show the size variations of DNA origami nanostructures induced by pH titration. The size distribution shifted to the left when the pH changed from pH 9, pH 7.5, to pH 5, corresponding to the sizes of DNA origami trimers, dimers, and monomers, respectively, which is consistent with our design.

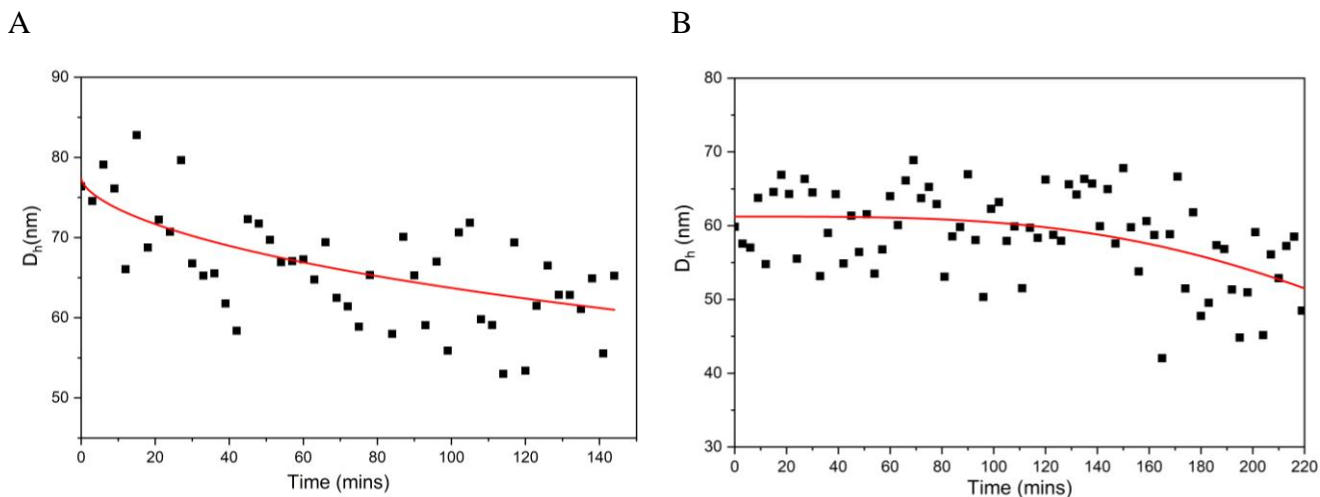

**Figure S9:** Time-dependent DLS study of the dynamic dissociation of DNA origami nanostructures driven by DNA triplexes. A) The DNA origami trimers dissociated to dimers when the pH was changed from 9 to 7.5. B) The DNA origami dimers dissociated to monomers when the pH was changed from 7.5 to 5.

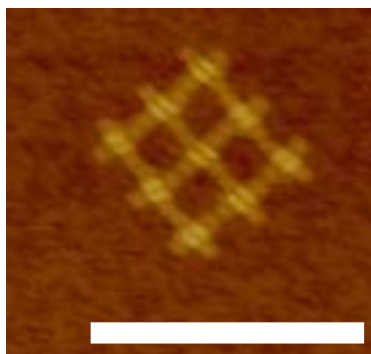

**Figure S10:** AFM image of assembled 9-tile DNA origami. Rotation of the origami units exactly followed our theoretical design. Scale bar: 500nm.

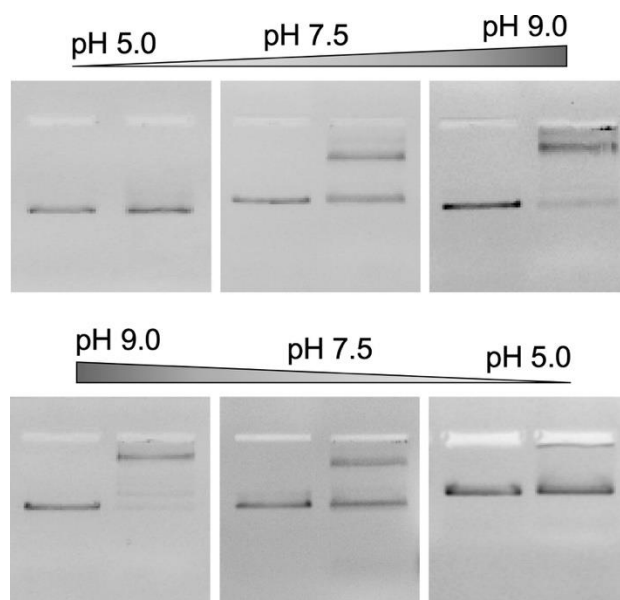

**Figure S11.** Stepwise and reversible assembly of DNA origami 9-tile clusters demonstrated by agarose gel electrophoresis. Left lane of each image is DNA origami monomer, used as reference control, to show the bands mobility of targeted 5-tiles and 9-tiles. The yield of the 5-tile structure is 66.9%, while the yield of 9-tile is 72.8% based on gel electrophoresis.

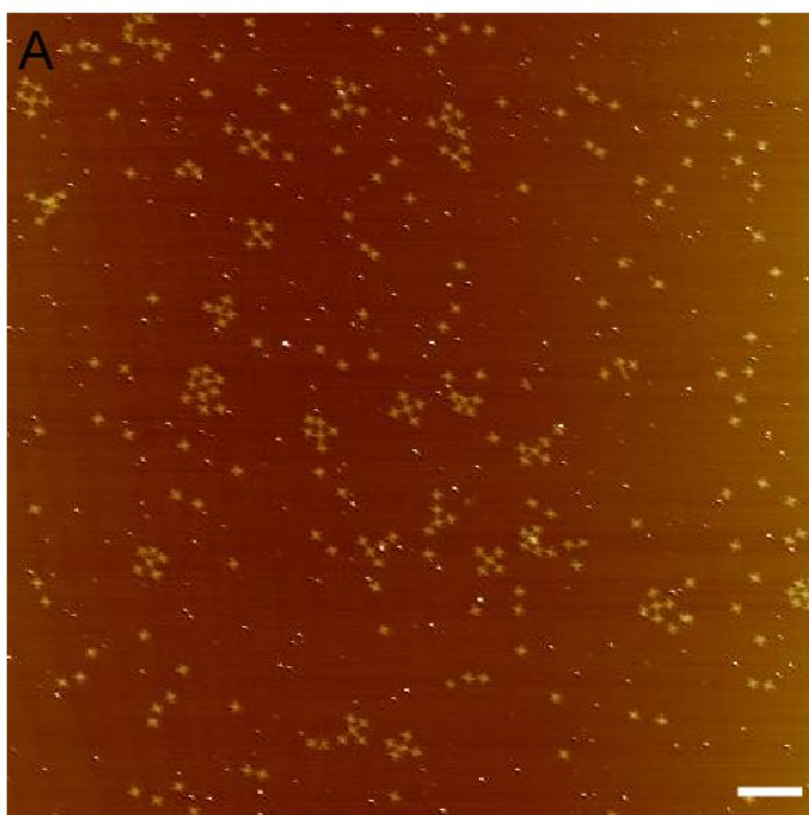

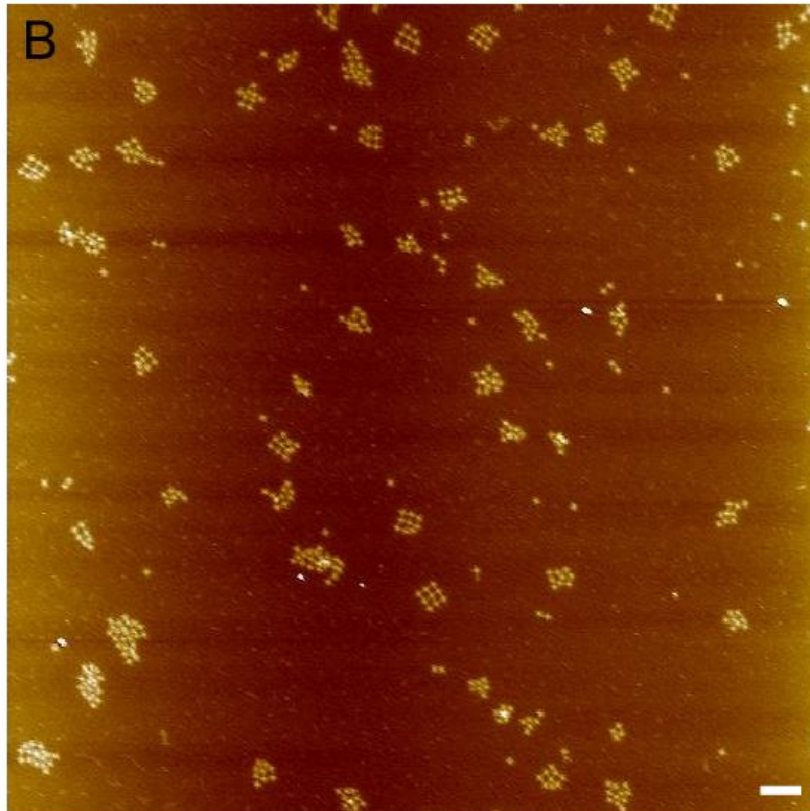

**Figure S12:** AFM images of unpurified 5-tile and 9-tile DNA origami. A) A representative 5-tile DNA origami. B) A representative 9-tile DNA origami. Aggregation and partial formation of DNA origami coexist with targeted structures. Scale bar: 500nm

**DNA Sequences used in this design:**

RC-M1 AGCTAATGCAGAACGCGCCTGTTTTAATATCC  
 RC-M2 CATCCTAATTTGAAGCCTTAAATCTTTTATCC  
 RC-M3 TGAATCTTGAGAGATAACCCACAAAACAATGA  
 RC-M4 AATAGCAATAGATGGGCGCATCGTACCGTATC  
 RC-M5 GGCCTCAGCTTGCATGCCTGCAGGGAATTCGT  
 RC-M6 AATCATGGTGGTTTTTCTTTTCACCCGCCTGG  
 RC-M7 CCCTGAGAGAGTTGCAGCAAGCGGGTATTGGG  
 RC-M8 CGCCAGGGTCATAGCTGTTTCCTGGACGGCCA  
 RC-M9 GTGCCAAGGAAGATCGACATCCAGATAGGTTA  
 RC-M10 CGTTGGTGTAGCTATCTTACCGAATTGAGCGC  
 RC-M11 TAATATCAACCTTCGCTAACGAGCCCRACTTG  
 RC-M12 CGGGAGGTTTTACGAGCATGTAGAACATGTTC  
 RC-M13 CTGTCCAGACGACGACAATAAACAAACCAATC  
 RC-M14 AATAATCGCGTTTTTAGCGAACCTCGTCTTTCC  
 RC-M15 AGAGCCTACAAAGTCAGAGGGTAAGCCTTTTT  
 RC-M16 TAAGAAAAGATTGACCGTAATGGGCCAGCTTT  
 RC-M17 CCGGCACCCACGACGTTGTAAAAGTGTGAAAT  
 RC-M18 TGTTATCCGGGAGAGGGCGGTTTGCTCCACGCT  
 RC-M19 GGTGTTGCCCCAGCAGGCGAAAATCAATCGGCC  
 RC-M20 AACGCGCGGCTCACAATCCACACCCAGGGTT  
 RC-M21 TTCCAGTGCTTCTGGTGCCGGAAGTGGGAAC  
 RC-M22 AAACGGCGGTAAGCAGATAGCCGAAACTGAAC  
 RC-M23 ACCCTGAAATTTGCCAGTTACAAATTCTAAGA  
 RC-M24 ACGCGAGGGCTGTCTTTCTTATCAAGTAATT  
 RC-M25 GTACCGACAAAAGGTAATTCCAAG  
 RC-M26 AACGGGTAGAAGGCTTATCCGGTAATAAACAG

RC-M28 GTCGGATTCTCCACCAGGCA  
RC-M30  
AGCCGGAAGCCAGCTGCATTAATGCTGTTTGTATGGTGTCTTCCTGTAGCCAGCTTTAATCGATG  
RC-M31 GCAAAATTCGGGAAACCTGTCGTGCATAAAGTGTAAGCGATGTGCT  
RC-M32 GCAAGGCGTTCGCCATTCAGGCTGCGCAACTG  
RC-M33 GGAAGCGCTTTATCCCAATCCAAAAAGCAAAT  
RC-M34 CAGATATATTAACCATACGGAAATTACCCAAAAGAACTGGCATGATTA  
RC-M35 AGGCATTTTCGAGCCAGTACTCATCG  
RC-M36 AGAACAAGTACCGCGCCCAATAGCTAAGAAAC  
RC-M39 CCTAATGAACTGCCCGCTTTCCAGCCCTTATA  
RC-M40 AATCAAAAGAATAGCCCTTTAAATATGCATTCTACTA  
RC-M41 GAGATAGGGTTGTCAGGATTAGAGAGTACCTATTCATT  
RC-M42 TTGCGCTCGTGAGCTAACTCACATGATAGCCC  
RC-M43 TATTACGCGGCGATCGGTGCGGGCGAGGATTT  
RC-M44 CAGCCTTTGTTAACGTCAAAAATTTTCAATT  
RC-M45 GGAATCATCAAGCCGTTTTTATTTGTTATATA  
RC-M46 TCGCCATATTTAACAACGTTGCGGGGTTTTAAGCCCAA  
RC-M47 CCAACAGTGTGTGCCCGTATAAACAGTTAACCAGAGC  
RC-M48 ACTATATGCTCCGGCTTAGGTTGGTCATCGTA  
RC-M51 TAAAACATCTTTAATGCGCGAACTTAATTGCG  
RC-M52 CTATTAGTCGCCATTA AAAAATACCATAGATTA  
RC-M53 GAGCCGTCTAGACTTTACAAACAATTCGACAA  
RC-M54 AATCGCGCAAAAGAAGTTAGTTAGCTTAAACAGCTTGATACGCCACGC  
RC-M55 TTTTTAACTAAATGCTGATGCAAAATTGAGAA  
RC-M56 CAAGACAAAATCATAGGTCTGAGACAAACAT  
RC-M59 CACCAGCAGGCACAGATTTAATTTCTCAATCATAAGGGAAC  
RC-M60 TGCTGGTAATATCCAGAACAATATAAGCGTAA  
RC-M61 GAATACGTGAAGATAAAACAGAGGATCTAAAA  
RC-M62 TATCTTTAAAATCCTTTGCCCGAACCGCGACCTGC  
RC-M63 CGAAACAAAGTAATAACGGA  
RC-M64 TTCGCCTGCAAAATTAATTACATTAATAGTGA  
RC-M65 ATTTATCAAGAACGCGAGAAAAGCTAGTATAAAGCCAATAAAGAATACAC  
RC-M66 ATATGCGTTATACAAATTTTACCTTTTCAA  
RC-M67 TATATTTTGACGCTGAGAAGAGTCTAACAAAT  
RC-M69 ATTTGTATCATCGCTTCTGAATTACAGTAACA  
RC-M71 TCAGTATTAACCCTTCTGACCTGATACCGCCA  
RC-M72 GCCATTGCAACAGGAAAAACGCTCTGGCCAAC  
RC-M73 AGAGATAGAACACCGCCTGCAACAAAATCAAC  
RC-M74 AGTAGAAAAGTTTGAGTAACATTA  
RC-M75 TTTGGATTATACCTGATAAATTGTGTGCGAAATCGTTATTA  
RC-M76 GTACCTTTATTACCTTTTTTTAATGCGATAGCT  
RC-M77 TAGATTAAGTTAATTCGATCTTCTTAGTATC  
RC-M78 TCATAATTACTAGAAAAAGCCTGTTGACCTAA  
RC-M79 ATTTAATGATCCTTGAAAACATAGGAAACAGT  
RC-M80 ACATAAATACGTCAGATGAATATATGGAAGGA  
RC-M81 ATTGAACCAATATAATCCTGATTGTCATTTTG  
RC-M82 CGGAACAATATCTGGTCAGTTGGCGTGCCACG  
RC-M83 CTGAGAGCAATAAAAGGGACATTCATGGAAAT  
RC-M84 ACCTACATTTTGACGCTCAATCGTCAGTGCGC  
RC-M85 CGACCAGTCAGCAGCAAATGAAAATCAAACCC  
RC-M86 TCAATCAAAGAAACCACCAGAAGGATGATGGC  
RC-M87 AATTCATCAACCATATCAAAATTATAGATTTT  
RC-M88 CAGGTTTACAATATATGTGAGTGATTAATTTT  
RC-M89 CCCTTAGAGTTTGAAATACCGACCCACCGGAA  
RC-M90 AAAAGGGTAAGATTGTATAAGCAAAAATTCGC  
RC-M91 AATAACCTTTAGAACCTCATATAAAAAGATTC  
RC-M92 GAAAGACTCAATTCTGCGAACGAGAAATGGTC  
RC-M93 CATAGTAATGACTATTATAGTCAGGGAAGCCC  
RC-M94 TAACAAAGTTAGGAATACCACATTTTACGAGG  
RC-M95 GCTGGCTGACCTTCATCAAGAGTAAATCAACG  
RC-M96 GTTGAGATCTGCTCATTCAAGTGAAGCGCATAG  
RC-M97 CTTTACCCGAGCAACACTATCATAATTCATCA  
RC-M98 TTGATTCTCAAAATATCGCGTTTTAATCAGGT  
RC-M99 AAAAATTTGTTTAGCTATATTTTCTGTAACAG

RC-M100 AAAACAGGGAGAAAGGCCGGAGACGCAAGGAT  
RC-M101 GTTAAATTTTTGTAAATCAGCTCAAGCCCA  
RC-M102 CACCATCACGGTTGATAATCAGAAAATTTT  
RC-M103 CGCGAGCTAAGCCTTTATTTCAACAGTCAA  
RC-M104 TTCAAAGTGAAGTTTCATTCCAATTTGGGG  
RC-M105 TTACCAGAATGACCATAAATCAAAAATTTCGAG  
RC-M106 GCCCTGACTATTACAGGTAGAAAGACCCTCGT  
RC-M107 ACAGATGAACGGTGTACAGACCAGTAAGGCTT  
RC-M108 AACAACATGAGAACACCAGAACGAGAAAGAGG  
RC-M110 ACGGTGTCCGAACCAGACCGGAAGAGTTCAGA  
RC-M112 ATGTACCATATGATATTCAACCGAATACTTT  
RC-M113 ACCAATAGGAACGCCATCAAAAATTCATCAT  
RC-M114 GATAAATTTTCGTA AAACTAGCATGAATTCGCGTCTGGCTGTTCCGAAATCG  
RC-M115 ATAGTAGTAACATTATGACCCTGTTTCTAGCT  
RC-M116 CAAACTCCAACAGTTGAGTGTGTTTCGTAGAAGAACTCAAAC TTTGAATGG  
RC-M117 GAGGCTTTCTCAAATGCTTTAAAC  
RC-M118 TTGGGCTTTACGTTAATAAAAACGAAATAGCGA  
RC-M119 CGAACTGACCAACTTTGTAGTAA  
RC-M120 GAAAAATCGAGATGGTTC AATATTTATCGGCCT  
RC-M123 AACGGTAAAATGCCGGAGAGGGTAAATCGGTT  
RC-M124 TTAAATGTGAGCGAGTAACAACCTTAAGGAAACCGAGGAAA  
RC-M125 CTGGAGCAAACAAGAGCATCAACA  
RC-M126 CTGAATCTAAATCATA CAGGCAAGTCAGAGCATGAAAGGGGCTGGGGTG  
RC-M127 GGTAATAGGCGGAATCGTCATAAATTTAATTGCTCCTTTTCTTAATTG  
RC-M128 TCATTGTGTTATACCAGTCAGGACCCAGAGGG  
RC-M129 AACGAGGCGCAGACGGAAC TTTAA  
RC-M130 CTGGCTCAAATTACCTTATGCGATAATGACAA  
RC-M132 GCTTAGAGGATAAGAGGTCATTTTTGAAACAT  
RC-M134 CTGAGAGTCTACAAAGGCTATCAGACTTGAGC  
RC-M135 CATTTGGGATTATCACCGTCACCGGTCATTGC  
RC-M136 CTCAGAGCACCGCCACCCTCAGAGATTAAGCA  
RC-M137 GAAAGTATTCGGAACCTATTATTCTGCGGATG  
RC-M138 CCACAGACACAAACTACAACGCCTGATAGCGT  
RC-M139 CAACCATCCGATAGTTGCGCCGACTTTAAGAA  
RC-M140 ATAACCGATCATCTTTGACCCCCAGCGATTATACCAAGTTCATGTTACTTAGCCGG  
RC-M142 TGCCTATTTAAGAGGCTGAGACTCGAGTTTCG  
RC-M144 AAAGGTGAAATTAGAGCCAGCAAAGCCGCCA  
RC-M145 CGCAATAATAACGGAATATTCATT  
RC-M146 TAGCACC AAAATATTGTAGTACCGCAATAAGAGAATATAAA  
RC-M147 CGCCGCCAGAACCGCCTCCCTCAGATCACCAG  
RC-M148 CTAAAGTTCATGTACCGTAACACTCTCAAGAGAAGGATTAGGATTA  
RC-M149 TAAAACACTATATTCGGTCGCTGATTTTCGAGGAGAATTTTCGTAACGAT  
RC-M150 GGGAGTTAAACGAAAGAGGCGTCGCTCAACAGTAGGGCTTATCCAATCG  
RC-M153 AGACTCCTTTGAGGGAGGGAAGGTTTACCATTAGCAAGGCACCAGAGC  
RC-M154 AGTATGTTAGCAAACGTAGAAAATGCGCCAAA  
RC-M155 TCACCAATGGCGACATTCAACCGATATTACGC  
RC-M156 TCAGACGAAATCAAAAATCACCGGACGGAAACG  
RC-M157 CCAGGCGGTTTTAACGGGGT CAGTGAGGCAGG  
RC-M158 AATGAATTCATTTTCAGGGATAGCGCTCAGTA  
RC-M159 TTTTGCGGGAGCCTTTAATTGTATCGTTAGTA  
RC-M160 GCCACTACGAAGGCACCAACCTAAAAGGCCGC  
RC-M161 TCCAAAAGGATCGTCACCCTCAGCTACGTAAT  
RC-M162 ACCACCCTTTCTGTATGGGATTTTAAAAAGGC  
RC-M163 GTAATAAGATAAGTGCCGTCGAGATCAGAGCC  
RC-M164 CTTTTCATTTGGCCTTGATATTCAGTGTACTG  
RC-M165 GACAAAAGGAAACCATCGATAGCATTGCCAT  
RC-M166 AAAGGTGGCAACATATAAAAAGAAACACAATCA  
RC-M167 ATCAGTAGTTCATATGGTTTACCAACATACAT  
RC-M168 TGGATCTTAGCCCCCTTATTAGCGGCACCCTA  
RC-M169 ATAAGTATTTTTGATGATACAGGACAAACGAA  
RC-M170 ACTTCAACTCAGAACCGCCACCCGGGTTGAT  
RC-M171 ACAGCATCGTTGAAAATCTCCAAAGCTAAACA  
RC-M172 GAAGTTTCCATTAAACGGGTAAAAAGCGAAAG  
RC-M173 TTTTTCACGGAACGAGGGTAGCAATTCATGAG

RC-M174 CCGCCACCCAGTTTCAGCGGAGTGATAATAAT  
 RC-M175 TACATGGCAGCCCGGAATAGGTGTCTCAGAA  
 RC-M176 TCGGTCATCATTAAGCCAGAATGAAGCGTCA  
 RC-M177 ATAGAAAACGACAGAATCAAGTTTCGGCATT  
 RC-M27-AS CCATATTAATTAGACGGGAGAATTACAAAGTTACC  
 RC-M29-AS AAGCGCCAATTAAGTTGGGTAACGAACATACG  
 RC-M37-AS GATTTTTTACAGAGAGAATAACATAAAAACAG  
 RC-M38-AS TTGGGAAGCAGCTGGCTTAAAGCTAGCTATTTTTGAGAGAT  
 RC-M49-AS ACCTGAGCAGAGGCGAATTATTCAGAAAATAG  
 RC-M50-AS AGAAGTATAATAGATAATACATTTCTCTTCGC  
 RC-M57-AS CAAGAAAAATTGCTTTGAATACCAAGTTACAA  
 RC-M58-AS CTCGTATTGGTGCCTAACAACACTAGAACGAAC  
 RC-M68-AS TGATTTGATACATCGGGAGAAACACAACGGAG  
 RC-M70-AS ATTTTAAAGGAATTGAGGAAGGTTTGAGGCGG  
 RC-M109-AS AAACGAGACGACGATAAAAACCAAATAACGG  
 RC-M111-AS TGCGGGAGGAAAAGGTGGCATCAAATAAAGT  
 RC-M121-AS GAATCCCCTGCAAAAAGAAGTTTTGGTTGGGAA  
 RC-M131-AS CCAATACTTAAAATGTTTAGACTGGTAGCATT  
 RC-M133-AS ATAAAGCCGCAAAGAATTAGCAAACCACCACC  
 RC-M141-AS TCACCAAGTACCCCTCATATGATGAAAGACTACC  
 RC-M143-AS CCCTCAGACGCCACCAGAACCACCATGCCCCC  
 RC-M122-AS GTACCAAAGCATTAAACATCCAATGGTGCTGTAGCTCAACATGTTT  
 RC-M151-AS TAGGAACCTTGTCGTCTTTCCAGACGGTTTATCAGCTTGCGGCTTGCA  
 RC-M152-AS CACCACCGGCATTGACAGGAGGTTGCCTTGAGTAACATAATTTAGGCAG

**Modified DNA Sequences used for the formation of DNA origami trimer:**

20% TAT Triplex

Triplex-A1R1 GTGTGATAAATAAGGCTTTTT  
 Triplex-A1R2 ATAACCTTGCTTCTGTTTTTT  
 Triplex-A1R4 AGCGGAATTATCATCATTTTT  
 Triplex-A1R5 ATCTAAAGCATCACCTTTTTT  
 Triplex-A1R1G  
 CTCATGCCTCCCCTCCCCTCCGTTTCCCTCCCCTCCCCTCCATTTGGAGGGGAGGGGAGGTTTTTTTT  
 GTTAAATAAGAATAAA  
 Triplex-A1R2G  
 CTCATGCCTCCCCTCCCCTCCGTTTCCCTCCCCTCCCCTCCATTTGGAGGGGAGGGGAGGTTTTTTTT  
 AAATCGTTCGCTATTA  
 Triplex-A1R4G  
 CTCATGCCTCCCCTCCCCTCCGTTTCCCTCCCCTCCCCTCCATTTGGAGGGGAGGGGAGGTTTTTTTT  
 TATTCCTGATTATCAG  
 Triplex-A1R5G  
 CTCATGCCTCCCCTCCCCTCCGTTTCCCTCCCCTCCCCTCCATTTGGAGGGGAGGGGAGGTTTTTTTT  
 TGCTGAACCTCAAATA  
 Blunt RE3 TTTTAAATAAAGAAATTGCGTTAGCACGTAACACAGTTTT  
 Blunt RE6 TTTTACATTGGCAGATTCACCTGAAATGGATTATTTTTTT

Triplex-A2L1 GGGAGGCATGAGTTTTTTTTTCTGAACAAGAAAAAATCAACAATAGATAAGTTTTT  
 Triplex-A2L2 GGGAGGCATGAGTTTTTTTTTGCACCCAGCTACAAAAGATTAGTTGCTATTTTTTT  
 Triplex-A2L4 GGGAGGCATGAGTTTTTTTTGTTTGAGGGGACGACGAACCGTGCATCTGCCATTTTT  
 Triplex-A2L5 GGGAGGCATGAGTTTTTTTTCCCGGGTACCGAGGTCTCGACTCTAGAGGATCTTTTT  
 Blunt LE3 TTTTAAATAAAGAGCAAGAGAATTGAGTTAAGCCCTTTT  
 Blunt LE6 TTTTAGCTGATTGCCCTTACAGTGAGACGGGCAACTTT

73% TAT Triplex

Triplex-A1R1 GTGTGATAAATAAGGCTTTTT  
 Triplex-A1R2 ATAACCTTGCTTCTGTTTTTT  
 Triplex-A1R4 AGCGGAATTATCATCATTTTT  
 Triplex-A1R5 ATCTAAAGCATCACCTTTTTT  
 Triplex-A2R1  
 TCGTATTCTTCTTCTTTCTTGTTTCTTCTTTCTTCTTCTTATTTAAGAAGAAGAAAGAATTTTTTTTGT  
 TAAATAAGAATAAA

Triplex-A2R2

TCGTATTTCTTCTTTCTTTCTTTGTTTCTTCTTTCTTCTTCTTATTTAAGAAGAAGAAAGAATTTTTTTTA  
AATCGTCGCTATTA

Triplex-A2R4

TCGTATTTCTTCTTTCTTTCTTTGTTTCTTCTTTCTTCTTCTTATTTAAGAAGAAGAAAGAATTTTTTTTA  
TTCTGATTATCAG

Triplex-A2R5

TCGTATTTCTTCTTTCTTTCTTTGTTTCTTCTTTCTTCTTCTTATTTAAGAAGAAGAAAGAATTTTTTTTG  
CTGAACCTCAAATA

Blunt RE3 TTTTAAATAAAGAAATTGCGTTAGCACGTAAAACAGTTTT

Blunt RE6 TTTTACATTGGCAGATTCACCTGAAATGGATTATTTTTTT

Triplex-A3L1 GAAGAAATACGATTTTTTTTTTCTGAACAAGAAAAAATCAACAATAGATAAGTTTTT

Triplex-A3L2 GAAGAAATACGATTTTTTTTTTGCACCCAGCTACAAAAGATTAGTTGCTATTTTTTT

Triplex-A3L4 GAAGAAATACGATTTTTTTTTGTTTGAGGGGACGACGAACCGTGCATCTGCCATTTTT

Triplex-A3L5 GAAGAAATACGATTTTTTTTTCCCGGGTACCGAGGTCTCGACTCTAGAGGATCTTTTT

Blunt LE3 TTTTAATAATAAGAGCAAGAGAATTGAGTTAAGCCTTTT

Blunt LE6 TTTTAGCTGATTGCCCTTCACAGTGAGACGGGCAACTTTT

### Modified DNA Sequences used for the formation of 9-tile origami:

pH-A4-Left-linearSE1

GGGAGGCATGAGTTTTTTTTTCTGAACAAGAAAAAATCAACAATAGATAAGTTTTT

pH- A4-Left-linearSE2

GGGAGGTCTCAATTTTTTTTTTGCACCCAGCTACAAAAGATTAGTTGCTATTTTTTT

pH- A4-Left-linearSE4

GGGAGGATACATTTTTTTTTTGTTTGAGGGGACGACGAACCGTGCATCTGCCATTTTT

pH- A4-Left-linearSE5

GGGAGGTAGTCATTTTTTTTTCCCGGGTACCGAGGTCTCGACTCTAGAGGATCTTTTT

pH-A4-Right-linearSE6

GGGAGGCATGAGTTTTTTTTTACATTGGCAGATTCACCTGAAATGGATTATTTTTTTTT

pH-A4-Right-linearSE5

GGGAGGTCTCAATTTTTTTTTTGCTGAACCTCAAATAATCTAAAGCATCACCTTTTTT

pH-A4-Right-linearSE3

GGGAGGATACATTTTTTTTTTAAATAAAGAAATTGCGTTAGCACGTAAAACAGTTTTT

pH-A4-Right-linearSE2

GGGAGGTAGTCATTTTTTTTTAAATCGTCGCTATTAATAAACCTTGCTTCTGTTTTTT

pH-A4-Down-linearSE1

GGGAGGCATGAGTTTTTTTTTCGTTAATATTTTGTTAATATTTAAATTGTAAATTTTTTTTT

pH-A4-Down-linearSE2

GGGAGGTCTCAATTTTTTTTTTGAGTAATGTGTAGGTTTTTAAATGCAATGCCTTTTT

pH-A4-Down-linearSE4

GGGAGGATACATTTTTTTTTTATCAAAAAGATTAAGAAAGCAAAGCGGATTGCTTTTT

pH-A4-Down-linearSE5

GGGAGGTAGTCATTTTTTTTTATAACGCCAAAAGGAACAACCTAATGCAGATACTTTTT

pH-A4-Top-linearSE6

GGGAGGCATGAGTTTTTTTTTGAGGACTAAAGACTTTCGGCTACAGAGGCTTTTTTTTT

pH-A4-Top-linearSE5

GGGAGGTCTCAATTTTTTTTTACTAAAGGAATTGCGAAGAATAGAAAGGAACATTTTT

pH-A4-Top-linearSE3

GGGAGGATACATTTTTTTTTTAAATTTACCGTTCCAGTGAAAGCGCAGTCTCTGTTTTT

pH-A4-Top-linearSE2

GGGAGGTAGTCATTTTTTTTTTGTAGCGCGTTTTTCATGCCTTTAGCGTCAGACTTTTT

pH-A5-Right-Triplex SE1

CTCATGCCTCCCCTCCCCTCCGTTTCCCTCCCCTCCCCTCCATTTGGAGGGGAGGGGAGGTTTTTTTT

GTTAAATAAGAATAAA

pH-A5-Right-Triplex SE2

TTGAGACCTCCCCTCCCCTCCGTTTCCCTCCCCTCCCCTCCATTTGGAGGGGAGGGGAGGTTTTTTAA

ATCGTCGCTATTAATAACCTT



pH-A5-Right-Triplex SE4

ATGTATCCTCCCCTCCCCTCCGTTTCCCTCCCCTCCCCTCCATTTGGAGGGGAGGGGAGGTTTTTTTA  
TTCTGATTATCAGAGCGGAAT

pH-A5-Right-Triplex SE5

TGACTACCTCCCCTCCCCTCCGTTTCCCTCCCCTCCCCTCCATTTGGAGGGGAGGGGAGGTTTTTTTG  
CTGAACCTCAAATAATCTAAAG

pH-A5-TOP-linearSE2

GAAGAAACGATTTTTTTTTTTGTAGCGCGTTTTTCATGCCTTTAGCGTCAGACTTTTT

pH-A5-TOP-linearSE4

GAAGAACTACCGTTTTTTTTTTGGTTTTAGTACCGCCACATCACCGTACTCAGGATTTTT

pH-A5-Down-linearSE2

GAAGAAGATGACTTTTTTTTTTGAGTAATGTGTAGGTTTTTAAATGCAATGCCTTTTT

pH-A5-Down-linearSE4

GAAGAACCTCGATTTTTTTTTATCAAAAAGATTAAGAAAGCAAAGCGGATTGCTTTTT

pH-A6-TOP-TriplexS2

GTCATCTTCTTCTTCTTCTTGTGTTTCTTCTTCTTCTTCTTATTTAAGAAGAAGAAAGAATTTTTTGT  
AGCGCGTTTTTCATGCCTTTAG

pH-A6-TOP-TriplexS4

TCGAGGTTCTTCTTCTTCTTGTGTTTCTTCTTCTTCTTCTTATTTAAGAAGAAGAAAGAATTTTTTGGT  
TTAGTACCGCCACATCACCGT

pH-A6-Right-TriplexS3

CGGTAGTTCTTCTTCTTCTTGTGTTTCTTCTTCTTCTTCTTATTTAAGAAGAAGAAAGAATTTTTTAAA  
TAAAGAAATTGCGTTAGCACG

pH-A6-Right-TriplexS5

AATCGTTTCTTCTTCTTCTTGTGTTTCTTCTTCTTCTTCTTATTTAAGAAGAAGAAAGAATTTTTTGC  
TGAACCTCAAATAATCTAAAG
